# Supplementary material for: ARMC5 mutations in familial and sporadic primary bilateral macronodular adrenal hyperplasia
Source: PubMed Central journal article supplement (PMC5784932; doi:10.1371/journal.pone.0191602), 2018-01-25
Supplement: pone.0191602.s001.pdf [file pone.0191602.s001.pdf]

A C A G C C G G C A C C G A G A G C T G G G

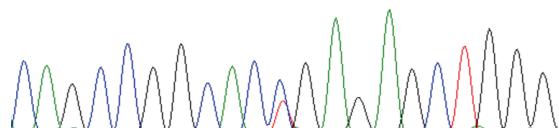

F1-I-2, c.1855C>T (p.(Arg619\*))

B C A G C C G G C A C T G A G A G C T G G G

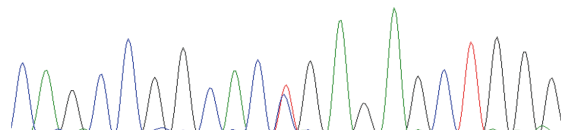

F1-II-3, c.1855C>T (p.(Arg619\*))

C C A G C C G G C A C C G A G A G C T G G G

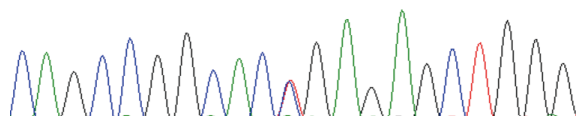

F1-III-1, c.1855C>T (p.(Arg619\*))

D C A G C C G G C A C C G A G A G C T G G G

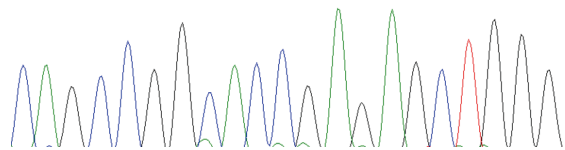

F1-I-1, no mutation

E C A G C C G G C A C C G A G A G C T G G G

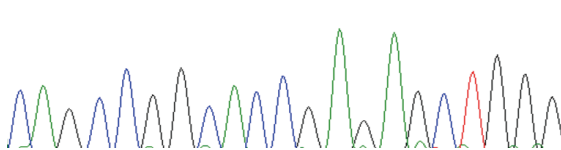

F1-II-2, no mutation

F C A G C C G G C A C C G A G A G C T G G G

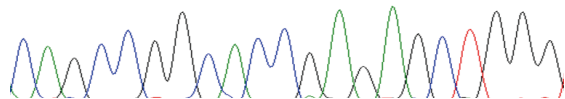

F1-II-4, no mutation

G C A G C C G G C A C C G A G A G C T G G G

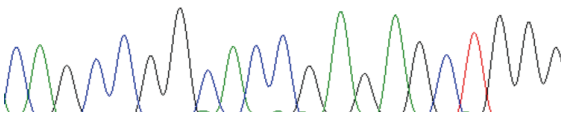

F1-III-3, no mutation

Supplemental figure 1
