# Supplementary material for: ARMC5 mutations in familial and sporadic primary bilateral macronodular adrenal hyperplasia
Source: PubMed Central journal article supplement (PMC5784932; doi:10.1371/journal.pone.0191602), 2018-01-25
Supplement: pone.0191602.s006.pdf [file pone.0191602.s006.pdf]

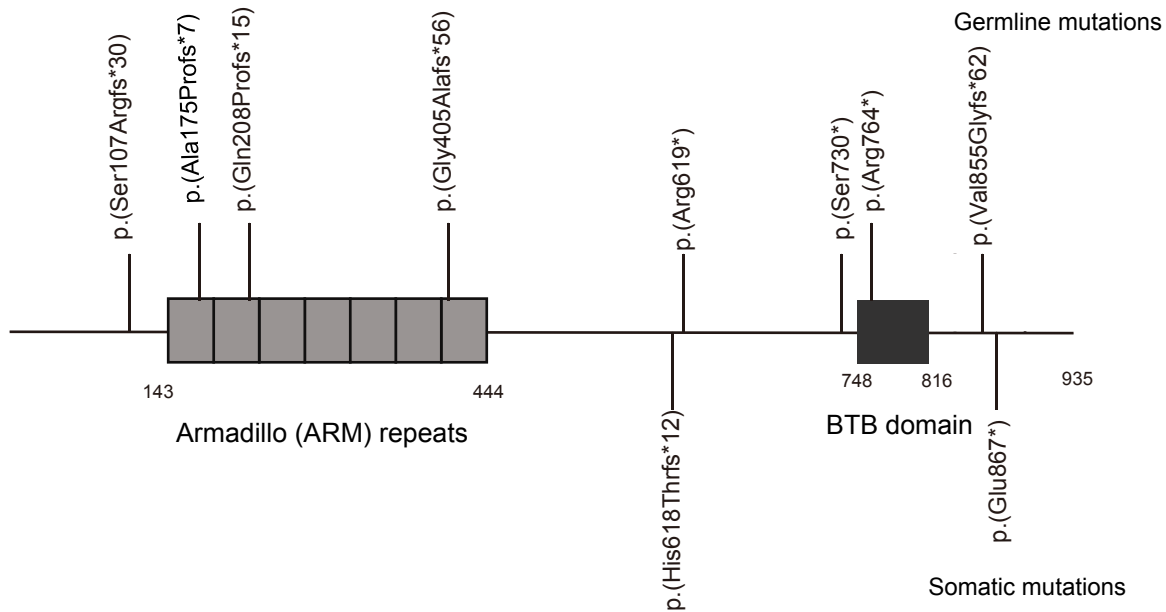

Supplemental figure 6
