# Supplementary material for: ARMC5 mutations in familial and sporadic primary bilateral macronodular adrenal hyperplasia
Source: PubMed Central journal article supplement (PMC5784932; doi:10.1371/journal.pone.0191602), 2018-01-25
Supplement: pone.0191602.s008.pdf [file pone.0191602.s008.pdf]

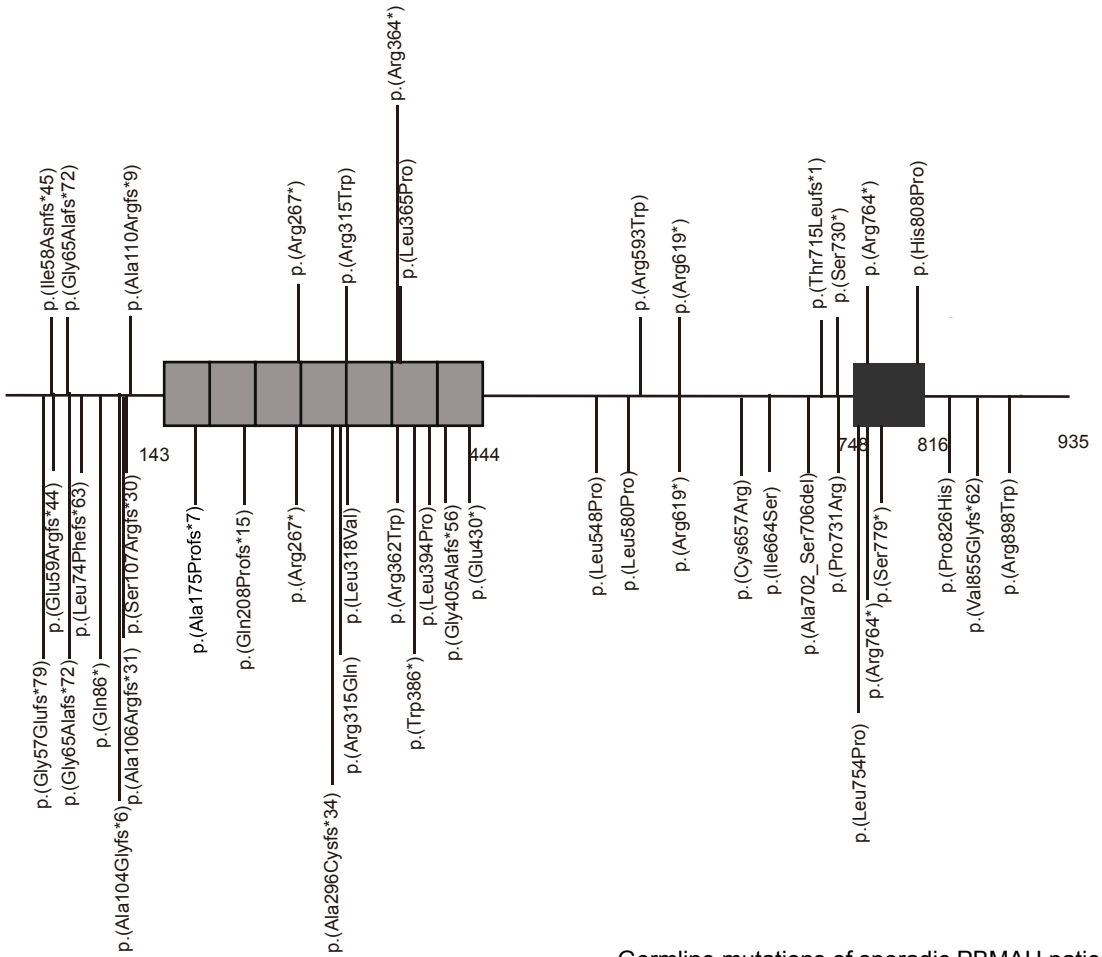

Germline mutations of sporadic PBMAH patients

 Armadillo (ARM) repeats

 BTB domain

Supplemental figure 8
